# Supplementary material
Source: Springer Nature journal article supplement (https://www.springermedizin.de/resource/supplementary/12889_2008_1672_MOESM5_ESM.pdf/9503698)
Supplement: MOESM5 [file 9503698]

**Table 2:** Results of multivariate logistic regression model

| Variable                            | Category      | Unweighted ORs(95%CI) | Weighted ORs(95%CI) | <i>p</i> -value |
|-------------------------------------|---------------|-----------------------|---------------------|-----------------|
| Age(yrs)                            | As continuous | 4.00(2.26-7.08)       | 4.01(2.46-6.53)     | <b>0.000</b>    |
| Family with television set          | Yes           | 0.00                  | 1.00                |                 |
|                                     | No            | 3.26(1.28-8.33)       | 3.30(1.45-7.48)     | <b>0.012</b>    |
| Child leisure                       | Games         | 1.00                  | 1.00                |                 |
|                                     | Singing       | 0.92(0.61-1.40)       | 0.95(0.53-1.68)     | 0.82            |
| Number of siblings                  | Less than 3   | 1.00                  | 1.00                |                 |
|                                     | >Two          | 0.42(0.11-1.59)       | 0.41(0.10-1.63)     | 0.165           |
| Working adults residing with family | Yes           | 1.00                  | 1.00                |                 |
|                                     | No            | 2.31(1.06-5.04)       | 2.41(0.88-6.59)     | 0.08            |
